# Supplementary material
Source: PubMed Central journal article supplement (PMC7272263)
Supplement: NIHMS1545946-supplement-2.pdf [file NIHMS1545946-supplement-2.pdf]

## Supplementary Information

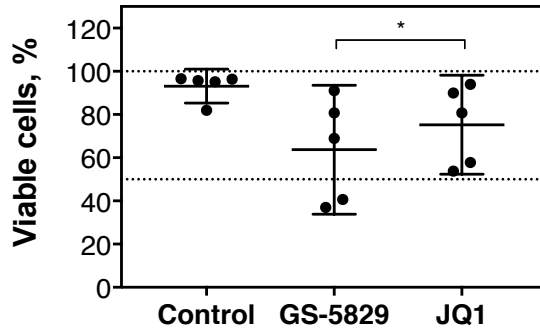

**Supplementary Figure 1. GS-5829 is a more potent inducer of apoptosis in primary CLL cells than JQ1.** Primary CLL cells co-cultured with NLCs were treated with 400 nM GS-5829 or JQ1 for 120 hours. The mean with 95% CI of viable CLL cells percentage by DiOC6/PI staining as measured in 5 samples. Paired t-test.

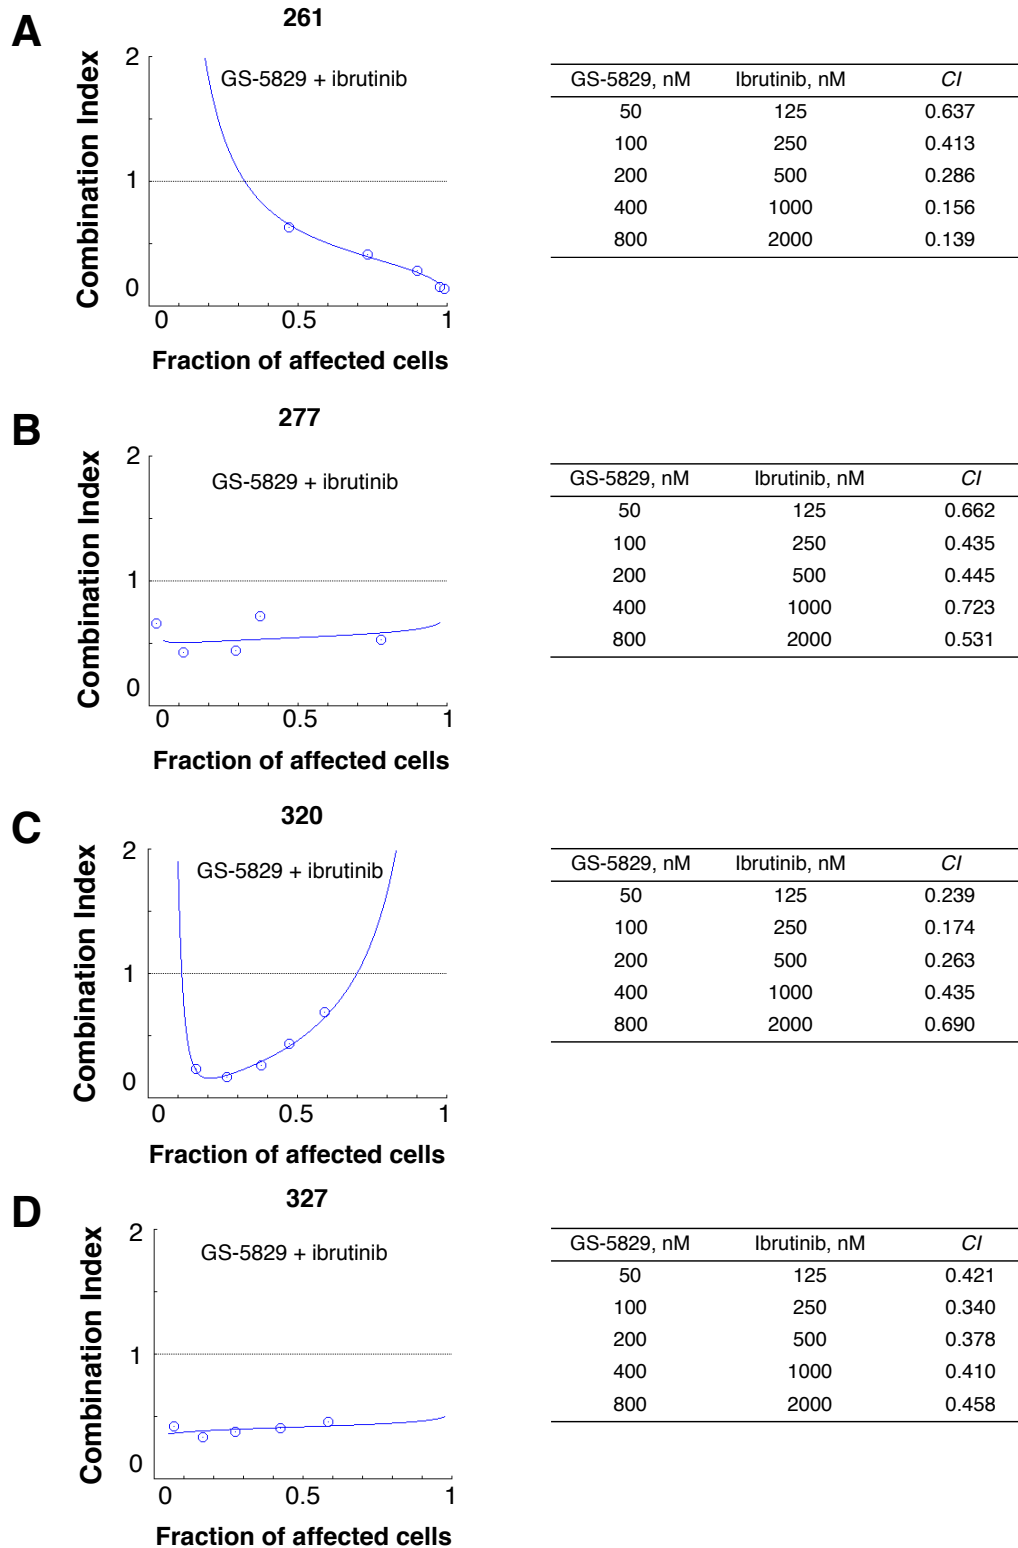

**Supplementary Figure 2. GS-5829 and ibrutinib synergistically induce apoptosis in primary CLL cells.** (A-D) Fa-CI plots generated using data from 4 samples demonstrate that GS-5829 and ibrutinib synergistically induce apoptosis in primary CLL cells co-cultured with NLCs.

**A**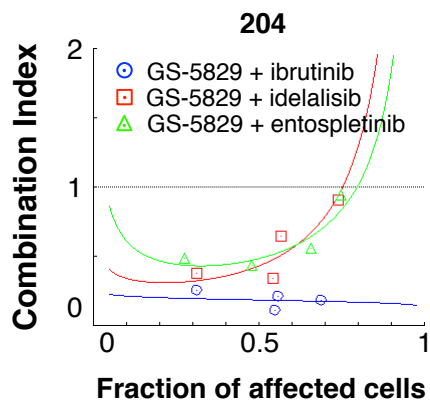

| GS-5829, nM | Ibrutinib, nM | CI    |
|-------------|---------------|-------|
| 100         | 250           | 0.256 |
| 200         | 500           | 0.115 |
| 400         | 1000          | 0.217 |
| 800         | 2000          | 0.187 |

---

| GS-5829, nM | Idelalisib, nM | CI    |
|-------------|----------------|-------|
| 100         | 250            | 0.381 |
| 200         | 500            | 0.341 |
| 400         | 1000           | 0.646 |
| 800         | 2000           | 0.912 |

---

| GS-5829, nM | Entospletinib, nM | CI    |
|-------------|-------------------|-------|
| 100         | 250               | 0.486 |
| 200         | 500               | 0.437 |
| 400         | 1000              | 0.565 |
| 800         | 2000              | 0.948 |

**B**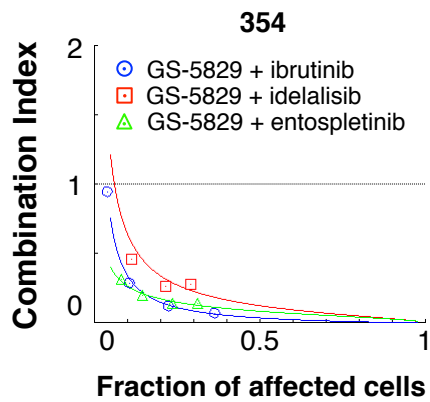

| GS-5829, nM | Ibrutinib, nM | CI    |
|-------------|---------------|-------|
| 100         | 250           | 0.943 |
| 200         | 500           | 0.289 |
| 400         | 1000          | 0.119 |
| 800         | 2000          | 0.069 |

---

| GS-5829, nM | Idelalisib, nM | CI    |
|-------------|----------------|-------|
| 100         | 250            | 2.075 |
| 200         | 500            | 0.463 |
| 400         | 1000           | 0.265 |
| 800         | 2000           | 0.282 |

---

| GS-5829, nM | Entospletinib, nM | CI    |
|-------------|-------------------|-------|
| 100         | 250               | 0.318 |
| 200         | 500               | 0.201 |
| 400         | 1000              | 0.139 |
| 800         | 2000              | 0.139 |

**Supplementary Figure 3. GS-5829 and the BCR signaling inhibitors demonstrate synergistic activity in a model of CLL microenvironment.** (A-B) Fa-CI plots generated using data from 2 samples demonstrate that GS-5829 and the BCR signaling inhibitors (ibrutinib, idelalisib, entospletinib) synergistically induce apoptosis in primary CLL cells co-cultured with NLCs.

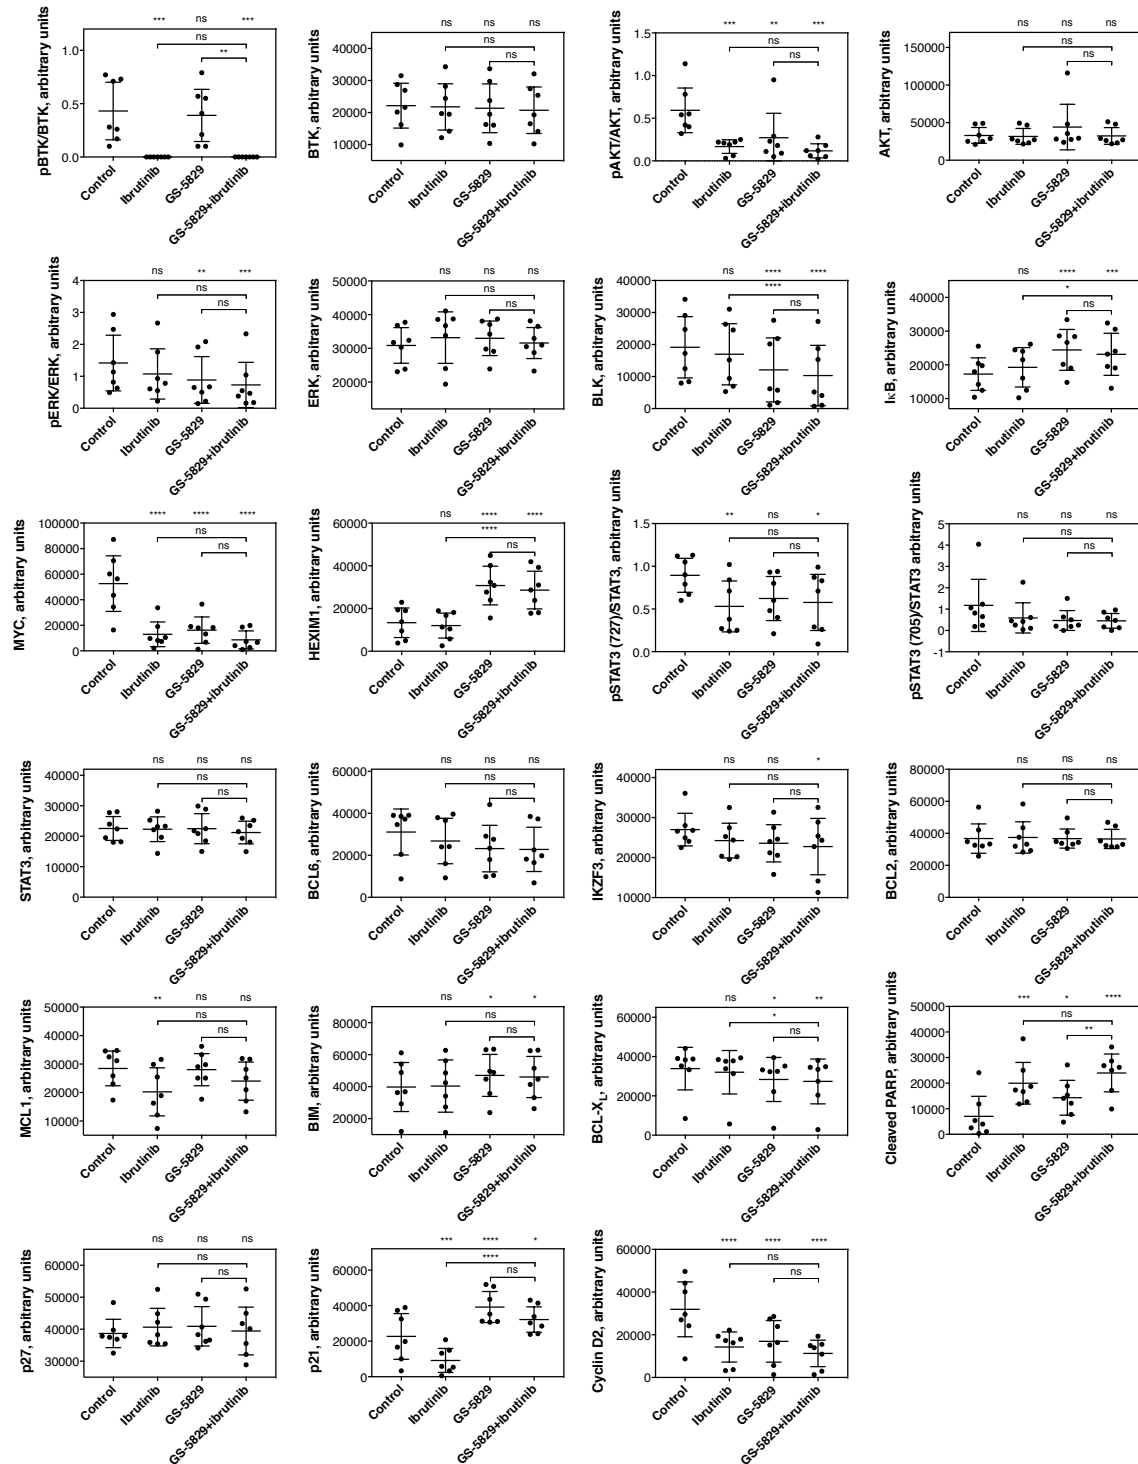

**Supplementary Figure 4. GS-5829 changes the levels of multiple proteins in CLL.** The protein content of CLL cells after 24 hours of treatment with GS-5829, ibrutinib or both was analyzed by Western blotting. The results were quantified by densitometry and normalized to  $\beta$ -actin level in each sample. The mean with 95% CI of normalized intensity as measured in 7 samples. Repeated measures one-way ANOVA with Sidak's post test.
